# Supplementary material for: Systemic arterial hypertension leads to decreased semen quality and alterations in the testicular microcirculation in rats
Source: PubMed Central journal article supplement (PMC6667492; doi:10.1038/s41598-019-47157-w), 2019-07-30
Supplement: 41598_2019_47157_MOESM1_ESM.pdf [file 41598_2019_47157_MOESM1_ESM.pdf]

## Systemic arterial hypertension leads to decreased semen quality and alterations in the testicular microcirculation in rats

Lucas Giglio Colli<sup>1</sup>; Larissa Berloff Belardin<sup>2</sup>; Cinthya Echem<sup>1</sup>; Eliana Hirome Akamine<sup>1</sup>; Mariana Pereira Antoniassi<sup>2</sup>; Rhayza Roberta Andretta<sup>2</sup>; Lucas Solla Mathias<sup>3</sup>; Stephen Fernandes de Paula Rodrigues<sup>1</sup>; Ricardo Pimenta Bertolla<sup>2</sup>; Maria Helena Catelli de Carvalho<sup>1</sup>

<sup>1</sup>Department of Pharmacology, Division of Vascular Biology, Hypertension Section, Instituto de Ciências Biomédicas, Universidade de São Paulo –ICB/USP, São Paulo, SP, Brazil.

<sup>2</sup>Department of Surgery, Division of Urology, Universidade Federal de São Paulo - UNIFESP, São Paulo, Brazil.

<sup>3</sup>Department of Internal Medicine, Botucatu Medical University, Universidade Estadual Paulista - UNESP, Botucatu, São Paulo, Brazil.

### Supplementary

#### Figure

A)

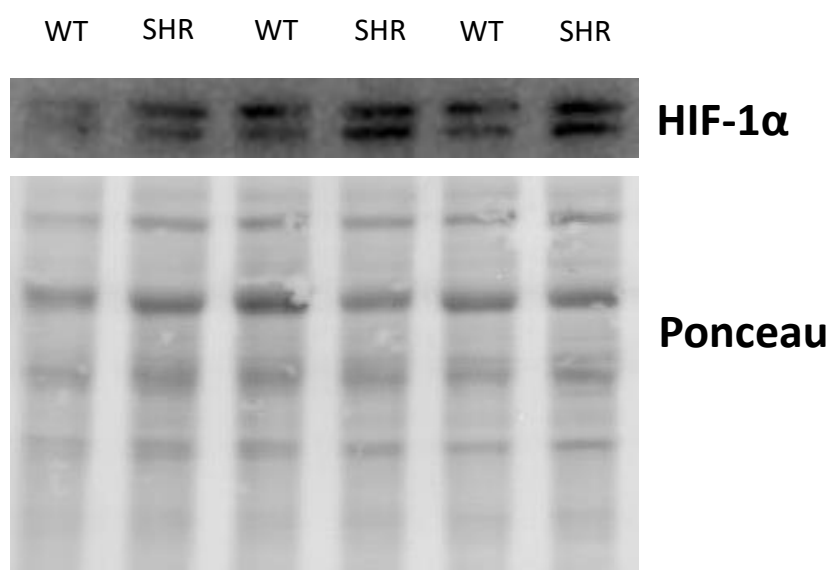

**B)**

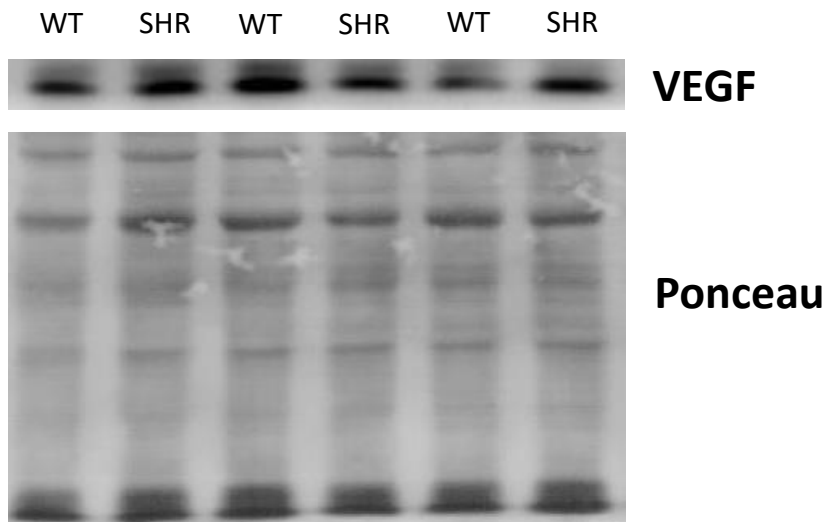

**Supplementary Figure 1.** Protein expression of **A)** HIF-1 $\alpha$  and **B)** VEGF in testes of spontaneously hypertensive rats (SHR) and Wistar rats (WT) by western blot. Hypoxia-inducible factor 1-alpha (HIF-1 $\alpha$ ), and vascular endothelial growth factor (VEGF).
